# Supplementary material for: Galectin-10: a new structural type of prototype galectin dimer and effects on saccharide ligand binding
Source: Oxford University Press journal article supplement (doi:10.1093/glycob/cwx107), 2017-12-22
Supplement: cwx107supplementaryfigure1.pdf [file cwx107supplementaryfigure1.pdf]

**Galectin-10: a new structural type of prototype galectin dimer and  
effects on saccharide ligand binding**

Jiyong Su<sup>1</sup>, Jin Gao<sup>1</sup>, Yunlong Si<sup>1</sup>, Linlin Cui<sup>1</sup>, Chenyang Song<sup>1</sup>, Yue Wang<sup>1</sup>, Runjie Wu<sup>1</sup>,  
Guihua Tai<sup>1</sup>, Yifa Zhou<sup>1</sup>

<sup>1</sup> Jilin Province Key Laboratory for Chemistry and Biology of Natural Drugs in Changbai  
Mountain, The School of Life Sciences, Northeast Normal University, Changchun 130024, China

To whom correspondence should be addressed: Tel: +0086 431 85098212; Fax: +0086 431

85098212; e-mail: [zhouyf383@nenu.edu.cn](mailto:zhouyf383@nenu.edu.cn))

## Supplementary figure 1

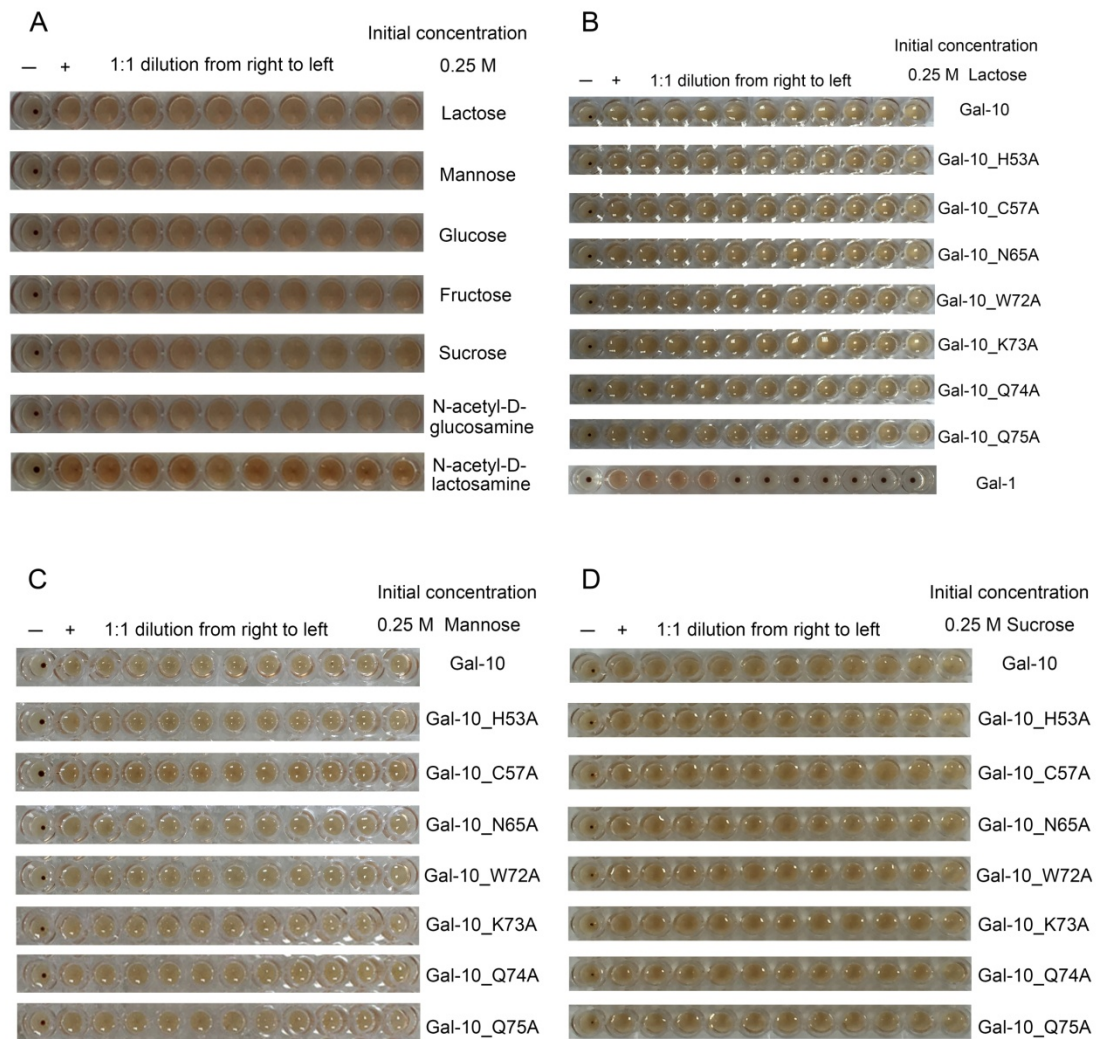

**Supplementary figure 1.** Erythrocyte agglutination inhibitory effects of four saccharides on Gal-10 and its variants. **A.** lactose, mannose, glucose, fructose, sucrose, N-acetyl-D-glucosamine and N-acetyl-D-lactosamine could not inhibit Gal-10-mediated erythrocyte agglutination. **B.C.D.** Lactose, mannose and sucrose could not inhibit Gal-10 and all variants from inducing erythrocyte agglutination.
